# Supplementary material for: Comparative profiling of microRNAs in the winged and wingless English grain aphid, Sitobion avenae (F.) (Homoptera: Aphididae)
Source: PubMed Central journal article supplement (PMC5071838; doi:10.1038/srep35668), 2016-10-20
Supplement: srep35668-s1.pdf [file srep35668-s1.pdf]

## Supplementary Materials

---

### **Comparative profiling of microRNAs in the winged and wingless English grain aphid, *Sitobion avenae* (F.) (Homoptera: Aphididae)**

Xiangrui Li<sup>1</sup>, Fangmei Zhang<sup>1,2</sup>, Brad Coates<sup>3</sup>, Yunhui Zhang<sup>1</sup>, Xuguo Zhou<sup>4,\*</sup>, Dengfa Cheng<sup>1,\*</sup>

<sup>1</sup>*State Key Laboratory for Biology of Plant Diseases and Insect Pests, Institute of Plant Protection, Chinese Academy of Agricultural Sciences, Haidian District, Beijing 100193, China.*

<sup>2</sup>*Xinyang Agriculture and Forestry University, Xinyang, Henan 464000, China.*

<sup>3</sup>*United States Department of Agriculture, Corn Insects & Crop Genetics Research Unit, USDA-ARS, Ames, IA 50011, USA.*

<sup>4</sup>*Department of Entomology, University of Kentucky, Lexington, KY 40546, USA.*

---

#### **\* Corresponding Authors:**

Dr. Dengfa Cheng  
Institute of Plant Protection  
Chinese Academy of Agricultural Sciences  
Yuanmingyuan West Road  
Beijing 100193, China  
Phone: 86-10-62815935  
Email: dfcheng@ippcaas.cn

Dr. Xuguo "Joe" Zhou  
Department of Entomology  
University of Kentucky  
S-225 Agricultural Science Center North  
Lexington, KY40546-0091  
Phone: 859-257-3125  
Fax: 859-323-1120  
Email: xuguozhou@uky.edu

## **Table Legends**

**Table S1. Summary of conserved miRNA.**

**Table S2. Summary of predicted miRNA.**

**Table S3. The predicted targets for *S. avenae* miRNAs based on sequences from a model species *D. melanogaster* and four aphid species, *A. pisum*, *M. persicae*, *T. citricida*, and *A. gossypii*.**

**Table S4. GO annotation for identified *S. avenae* miRNAs.**

**Table S5. KEGG analysis for targets of differentially expressed *S. avenae* miRNAs.**

**Table S6. Criteria used for miRNA prediction.**

## Figure Legends

**Figure S1. Homology analysis of *S. avenae*Let-7 with other insects.** api: *Acyrtosiphon pisum*; bmo: *Bombyx mori*; tca: *Tribolium castaneum*; der: *Drosophila erecta*; dpe: *Drosophila persimilis*; dan: *Drosophila ananassae*; dwi: *Drosophila will*; isc: *Ixodes scapularis*; ame: *Apis mellifera*;cqu: *Culex quinquefasciatus*; dmo: *Drosophila mojavenensis*; mse: *Manduca sexta*; dgr: *Drosophila grimshawi*; aga: *Anopheles gambiae*; dme: *Drosophila melanogaster*; dvi: *Drosophila virilis*; aae: *Aedes aegypti*; hme: *Heliconius Melpomene*; tur: *Tetranychus urticae*; dya: *Drosophila yakuba*; dse: *Drosophila sechellia*; ngi: *Nasonia giraulti*; dsi: *Drosophila simulans*; nlo: *Nasonia longicornis*; nvi: *Nasonia vitripennis*. (The red box indicates the miRNA seedpositions 2-8)

**Figure S2. Homology analysis of *S. avenaemiRNA-7* with other insects.** api: *Acyrtosiphon pisum*; bmo: *Bombyx mori*; tca: *Tribolium castaneum*; der: *Drosophila erecta*; dpe: *Drosophila persimilis*; dan: *Drosophila ananassae*; dwi: *Drosophila will*; isc: *Ixodes scapularis*; ame: *Apis mellifera*;cqu: *Culex quinquefasciatus*; dmo: *Drosophila mojavenensis*; mse: *Manduca sexta*; dgr: *Drosophila grimshawi*; aga: *Anopheles gambiae*; dme: *Drosophila melanogaster*; dvi: *Drosophila virilis*; aae: *Aedes aegypti*; hme: *Heliconius Melpomene*; tur: *Tetranychus urticae*; dya: *Drosophila yakuba*; dse: *Drosophila sechellia*; ngi: *Nasonia giraulti*; dsi: *Drosophila simulans*; nlo: *Nasonia longicornis*; nvi: *Nasonia vitripennis*. (The red box indicates the miRNA seedpositions 2-8)

**Figure S3. Predicted stem-loop structures for three novel miRNA precursors.**

**Figure S4. PCR Products of nine selected miRNAs potentially involved in *S. avenae* wing development.** cDNAs from the winged *S. avenae* were used for template. **Lane 1:** 100bp ladder marker; **Lane 2:** *miR-315*; **Lane 4:** *miR-1*; **Lane 6:** *miR-9a*; **Lane 8:** *PC-5p-113190\_15*; **Lane 10:** *PC-3p-2743\_844*; **Lane 12:** *miR-7*; **Lane 14:** *miR-8*; **Lane 16:** *miR-277*; **Lane 18:** *Let-7*. The other uneven lanes were negative controls for each target miRNA.

Figures

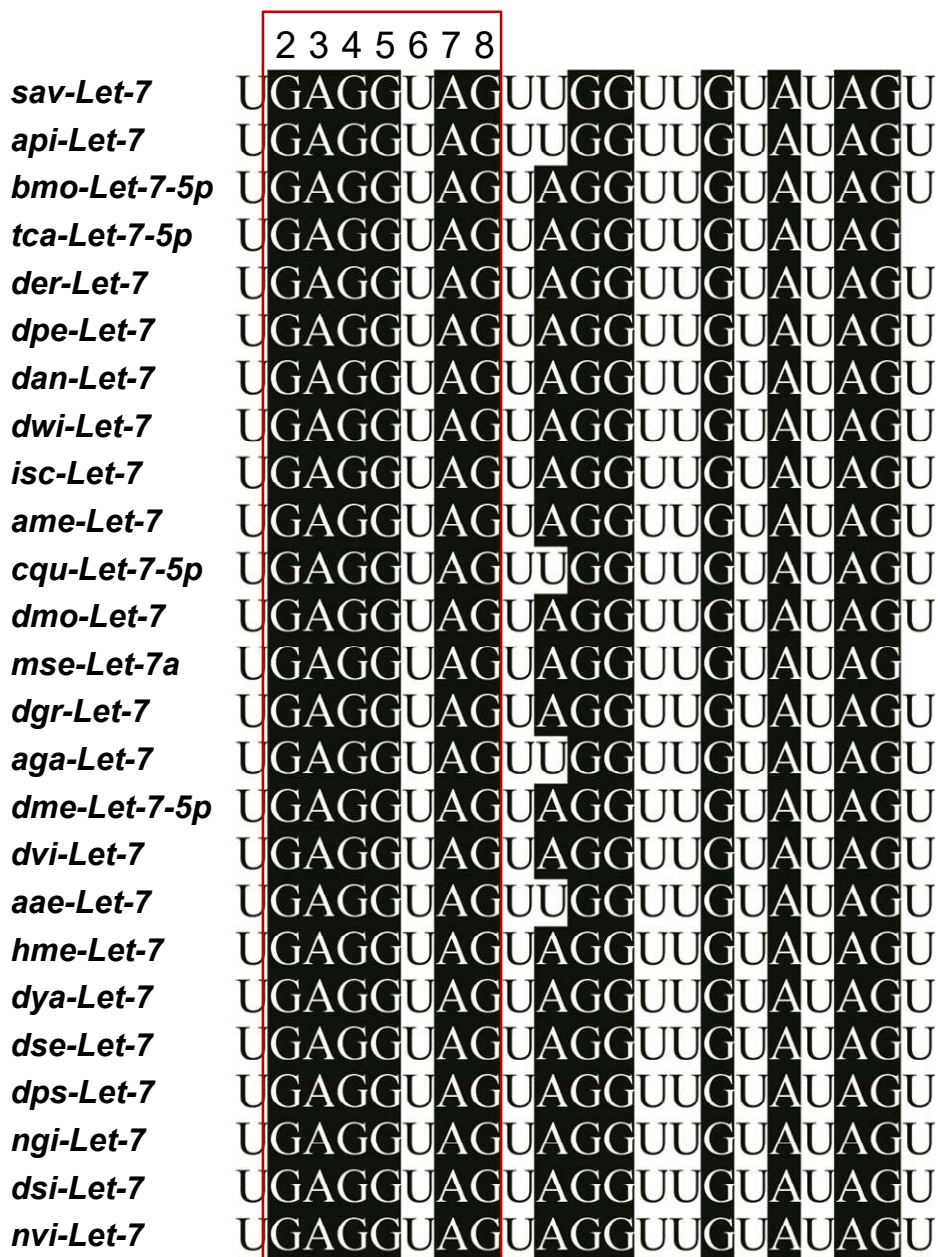

Figure S1

|                     | 2 | 3 | 4 | 5 | 6 | 7 | 8 |
|---------------------|---|---|---|---|---|---|---|
| <i>sav-miR-7</i>    | U | G | G | A | A | G | A |
| <i>api-miR-7</i>    | U | G | G | A | A | G | A |
| <i>bmo-miR-7-5p</i> | U | G | G | A | A | G | A |
| <i>tca-miR-7-5P</i> | U | G | G | A | A | G | A |
| <i>dpe-miR-7</i>    | U | G | G | A | A | G | A |
| <i>dpu-miR-7</i>    | U | G | G | A | A | G | A |
| <i>dan-miR7</i>     | U | G | G | A | A | G | A |
| <i>dwi-miR-7</i>    | U | G | G | A | A | G | A |
| <i>isc-miR-7</i>    | U | G | G | A | A | G | A |
| <i>ame-miR-7</i>    | U | G | G | A | A | G | A |
| <i>cqu-miR-7</i>    | U | G | G | A | A | G | A |
| <i>dmo-miR-7</i>    | U | G | G | A | A | G | A |
| <i>mse-miR-7</i>    | U | G | G | A | A | G | A |
| <i>dgr-miR-7</i>    | U | G | G | A | A | G | A |
| <i>aga-miR-7</i>    | U | G | G | A | A | G | A |
| <i>dme-miR-7-5p</i> | U | G | G | A | A | G | A |
| <i>dvi-miR-7-5p</i> | U | G | G | A | A | G | A |
| <i>aae-miR-7</i>    | U | G | G | A | A | G | A |
| <i>hme-miR-7</i>    | U | G | G | A | A | G | A |
| <i>tur-miR-7-5p</i> | U | G | G | A | A | G | A |
| <i>dya-miR-7</i>    | U | G | G | A | A | G | A |
| <i>dse-miR7</i>     | U | G | G | A | A | G | A |
| <i>dps-miR-7</i>    | U | G | G | A | A | G | A |
| <i>dsi-miR-7</i>    | U | G | G | A | A | G | A |
| <i>nlo-miR-7</i>    | U | G | G | A | A | G | A |
| <i>nvi-miR-7</i>    | U | G | G | A | A | G | A |

Figure S2

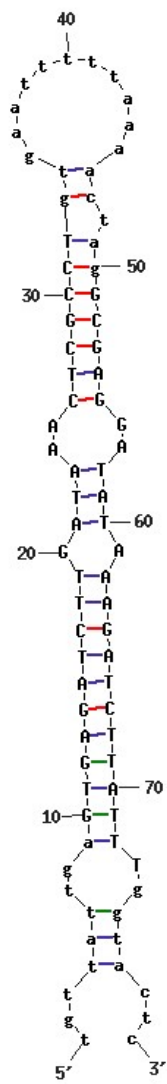

*PC-3p-99145\_16*

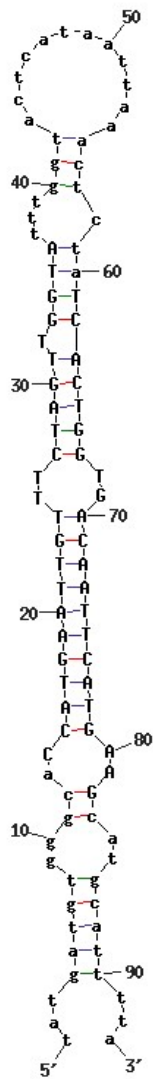

*PC-3p-55615\_34*

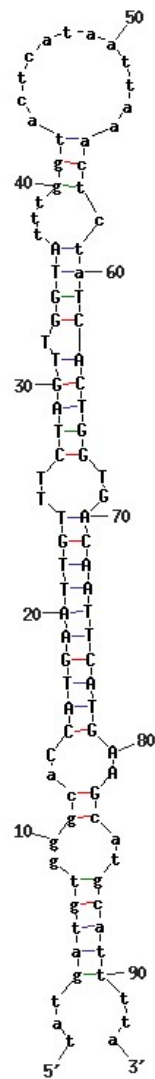

*PC-5p-373819\_3*

Figure S3

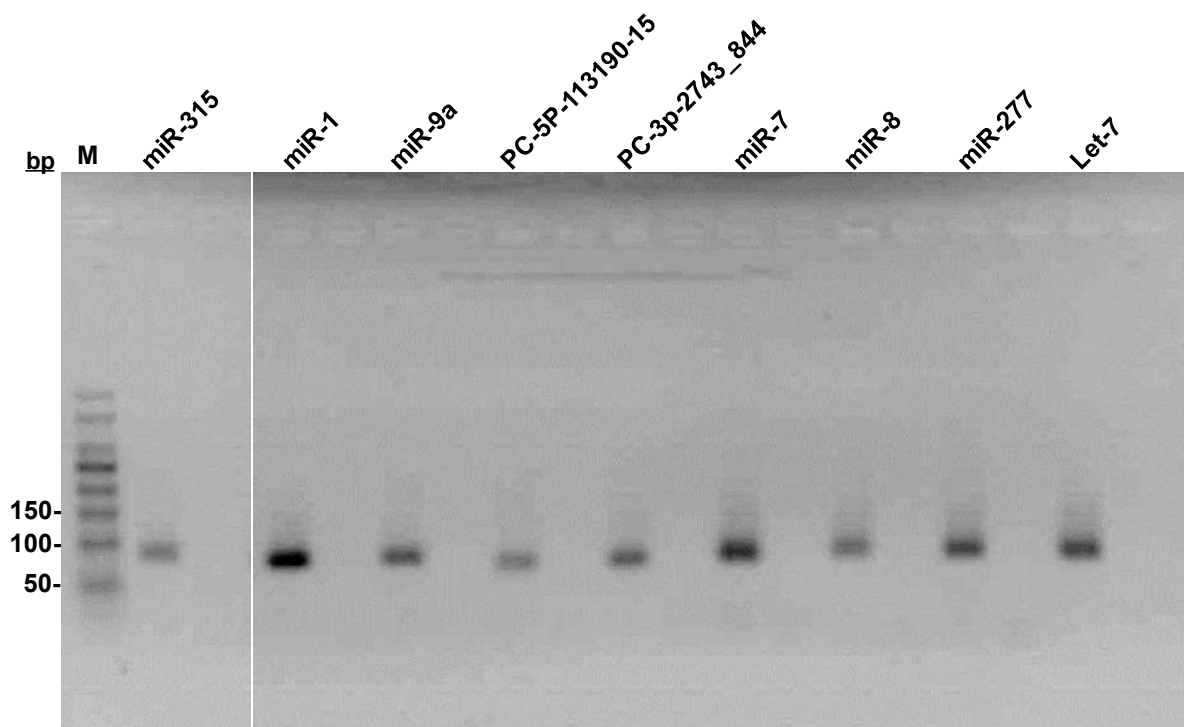

Figure S4
